# Supplementary material for: Molecular modulation of fluorene-dibenzothiophene-S,S-dioxide-based conjugated polymers for enhanced photoelectrochemical water oxidation under visible light
Source: Royal Society of Chemistry journal article supplement (doi:10.1039/c8qm00275d), 2018-01-01
Supplement: c8qm00275d1.pdf [file c8qm00275d1.pdf]

## Electronic Supporting Information

### **Molecular modulation of fluorene-dibenzothiophene-*S,S*-dioxide based conjugated polymers for enhanced photoelectrochemical water oxidation under visible light**

Chunhui Dai,<sup>†§</sup> Xuezhong Gong,<sup>‡§</sup> Xianglin Zhu,<sup>‡</sup> Can Xue,<sup>‡\*</sup> and Bin Liu<sup>†\*</sup>

<sup>†</sup>Department of Chemical and Biomolecular Engineering, National University of Singapore, 4 Engineering Drive 4, Singapore 117585, Singapore

<sup>‡</sup>School of Materials Science and Engineering, Nanyang Technological University, 50 Nanyang Avenue, Singapore 639798, Singapore

<sup>§</sup>Both authors contribute equally

Corresponding Authors

\*E-mail: cheliub@nus.edu.sg

\*E-mail: cxue@ntu.edu.sg

#### **Contents:**

ESI 1. Materials and measurements

ESI 2. Synthesis of the polymers

ESI 3. <sup>1</sup>H NMR spectra of the soluble polymers

ESI 4. FTIR spectra of polymers

ESI 5. Thermalgravitic analysis of polymers

ESI 6. Cyclic voltammograms curves of the polymers

ESI 7. XRD pattern of C6-i

## ESI 1. Materials and Measurements

All solvents and reagents were commercially available and analytical-reagent-grade. 9,9-dihexyl-2,7-di(1,3,2-dioxaborolan-2-yl)fluorene and 9,9-didodecylfluorene-2,7-diboronic acid were purchased from sigma-aldrich and used without further purification. NMR spectra of the polymers were acquired from a Bruker DRX-400 spectrometer. C, H, and S of elemental analyses were performed on an Elementar vario MICRO cube. Molecular weights of the polymers were determined by GPC with Waters-244 HPLC pump and THF was used as solvent and relative to polystyrene standards. UV-vis spectra were measured with a Shimadzu 3600 UV-vis-NIR spectrophotometer (reflectance spectra of polymer powder was obtained using an integrating sphere attachment with the BaSO<sub>4</sub> reference). The XRD patterns of film samples were collected on a Bruker D8 Advance X-ray powder diffractometer (Cu K $\alpha$  X-ray source) operating at a voltage of 40 kV and a current of 30 mA. Fluorescence spectra of the polymers were recorded on a FS5 Spectrofluorometer (Edinburgh Instruments). The morphology of polymer film was characterized by field emission scanning electron microscope (FESEM, JEOL, JSM-7610F) at an accelerating voltage of 5.0 kV. Thermogravimetric analyses (TGA) of the polymers were performed on Shimadzu DTG-60AH thermal analyzer with a heating rate of 15 °C/min under N<sub>2</sub> atmosphere. Fourier Transform Infrared spectra (FTIR) were recorded by using a Bio-Rad FTS-3500 ARX FTIR spectrometer in the range 4000-400 cm<sup>-1</sup>. The slice was made with powder constituted of KBr and sample by a tablet machine.

**Electrochemical measurements:** The cyclic voltammograms of as-prepared conjugated polymers were conducted in a deoxygenated anhydrous acetonitrile solution of tetrabutylammonium hexafluorophosphate (TBAPF<sub>6</sub>, 0.1 M). A platinum electrode was used as the counter electrode, glassy carbon electrodes (GCE) was used as working electrode, and

Ag/Ag<sup>+</sup> electrode (0.01 M AgNO<sub>3</sub> and TBAPF<sub>6</sub> in acetonitrile) was used as reference electrodes calibrated with ferrocene/ferrocenium couple (Fc/Fc<sup>+</sup>). HOMO and LUMO (eV) were calculated using the equation:  $-4.8 + E_{1/2, \text{Fc, Fc}^+}$  oxidation or reduction onset.

**Photoelectrode preparation:** The photoelectrode was prepared by spin coating (rpm: 2000) THF solution of the polymer on a fluorine-doped tin oxide (FTO) conductive glass, which was cleaned in turn with acetone, ethanol, and DI water under continuous sonication, and then allowed to dry at room temperature. The composite film was prepared by spin coating the THF solution (10 mg/mL) of C12 onto the TiO<sub>2</sub> nanorods grown onto the FTO glass.

**Photoelectrochemical activity measurement:** PEC measurements were performed using a conventional three-electrode cell system and an electrochemical workstation (CHI 852C, chenhua, China). The prepared electrode was employed as the working electrode. Meanwhile, a saturated Ag/AgCl electrode and a platinum electrode served as the reference and counterelectrode, respectively. All the potentials were referred to the saturated Ag/AgCl unless otherwise stated. MAX-302 xenon lamp (Asahi Spectra) equipped with an ultraviolet cut-filter ( $\lambda > 420$  nm) was used as light source to provide a visible light. Linear sweep voltammetry (LSV) curves were measured at a scanning rate of 10 mV s<sup>-1</sup>, ranging from -1.0 V to 1.0 V vs Ag/AgCl. Electrochemical impedance spectroscopy (EIS) was carried out with a frequency range from 100 mHz to 100 kHz at a bias of +0.6 V (vs Ag/AgCl) in 0.5 M Na<sub>2</sub>SO<sub>4</sub> solution.

## **ESI 2. Synthesis of the monomers and polymers**

**Synthesis of C6-s and C6-i:** A mixture of 3,7-dibromodibenzothiophene-*S,S*-dioxide (0.25 mmol, 93.5 mg), 9,9-dihexyl-2,7-di(1,3,2-dioxaborolan-2-yl)fluorene (0.25 mmol, 125.6 mg), and Pd(PPh<sub>3</sub>)<sub>4</sub> (2% mmol, 2.9 mg) was added in a 25 mL flask. 2 mL of dioxane, 6 mL of

toluene, and 3 mL of  $K_2CO_3$  aqueous solution (2 M) added by syringe after the tube was evacuated and refilled with Ar three times. The reaction mixture was stirred at 85 °C for 5 hours under argon, and then cooled down to room temperature. The mixture was poured into methanol and collected by filtration. The solids were washed with  $CH_3OH$ ,  $H_2O$  and acetone and then purified using a Soxhlet apparatus with THF. The soluble polymer C6-s was obtained concentration of THF solution as a yellow powder (35 mg, yield: 22%) and the insoluble polymer C6-i was obtained as a green powder (80 mg, yield: 51%). **C6-s**:  $^1H$  NMR (400 MHz,  $CDCl_3$ ):  $\delta$  8.19-8.13 (m, 1H), 7.99-7.86 (m, 3H), 7.76-7.57 (m, 2H), 2.14 (d, 3H), 1.26 (m, 7H), 0.89-0.71 (m, 6H). GPC results:  $M_n = 4810$ ;  $M_w = 7310$ ; PDI = 1.52. Anal. Calcd for **C6-s** ( $C_{43}H_{52}O_2S$ )<sub>n</sub>: C, 81.60; H, 8.28; S, 5.07. Found: C, 78.11; H, 7.67; S, 4.18. Anal. Calcd for **C6-i** ( $C_{43}H_{52}O_2S$ )<sub>n</sub>: C, 81.60; H, 8.28; S, 5.07. Found: C, 79.54; H, 7.85; S, 4.29.

**Synthesis of C12**: **C12** was synthesized from 9,9-didodecylfluorene-2,7-diboronic acid in 83% yield by the same procedure as the preparation of C6-s with the reaction time of 24 h: yellow solid.  $^1H$  NMR (400 MHz,  $CDCl_3$ ):  $\delta$  8.20-8.13 (m, 1H), 8.01-7.85 (m, 3H), 7.73-7.62 (m, 2H), 2.12 (s, 2H), 1.19-1.11 (d, 19H), 0.86-0.71 (m, 5H). GPC results:  $M_n = 12040$ ;  $M_w = 15290$ ; PDI = 1.27. Anal. Calcd for ( $C_{49}H_{64}O_2S$ )<sub>n</sub>: C, 82.07; H, 9.00; S, 4.47. Found: C, 78.94; H, 7.17; S, 3.69.

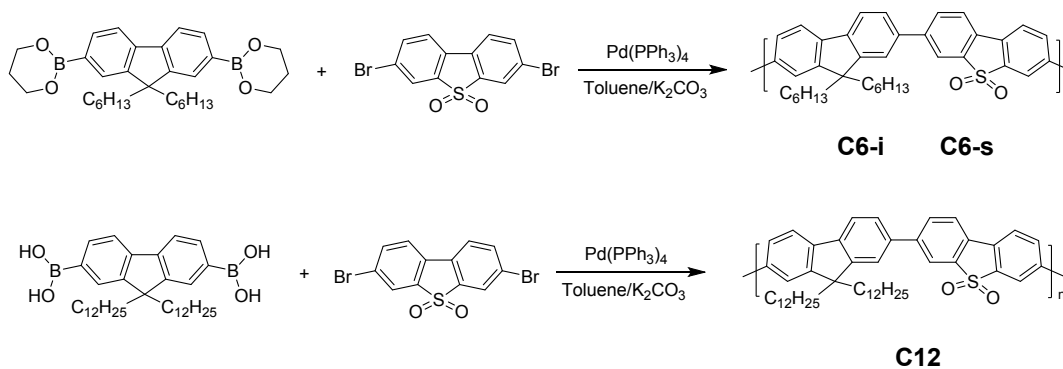

**Scheme S1** Synthetic procedures for the polymers

### ESI 3. NMR spectra of the polymers

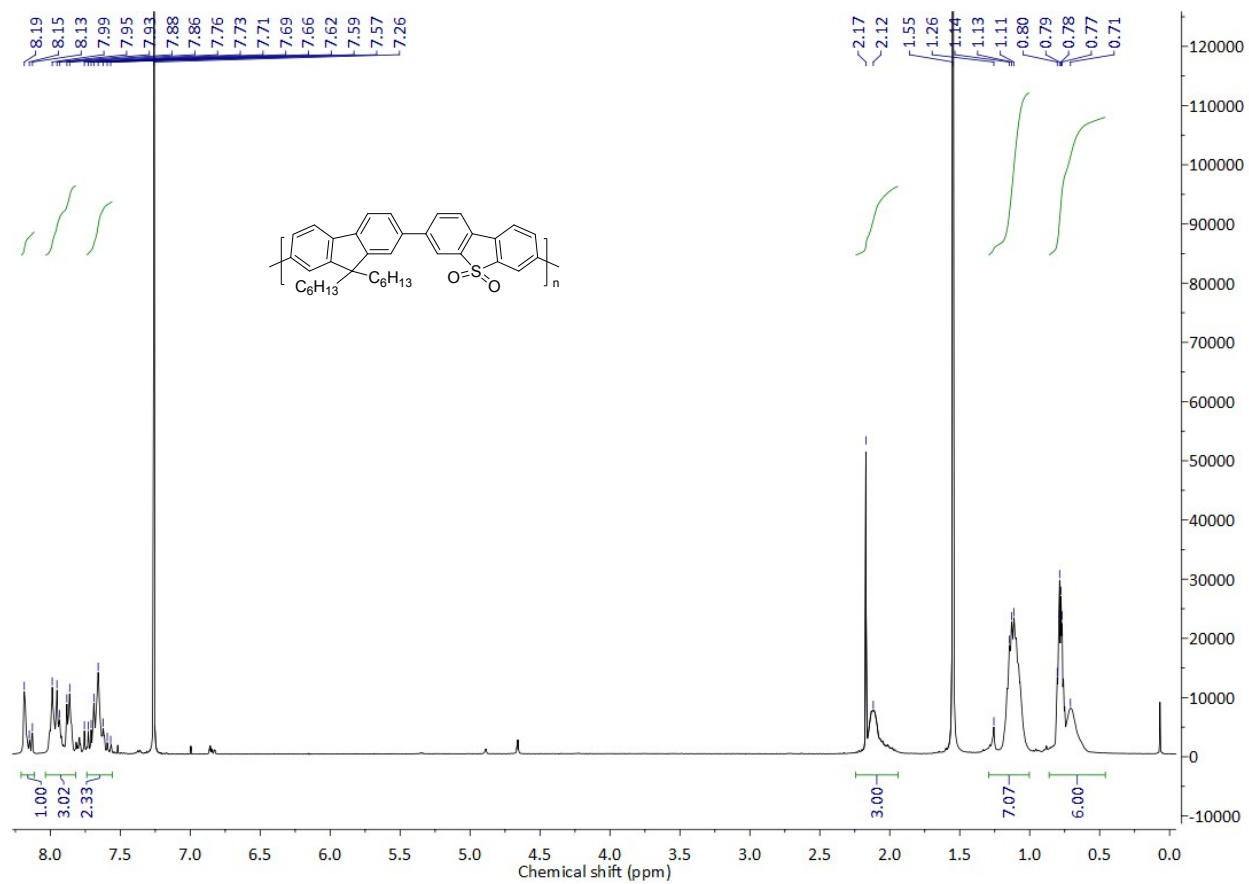

Fig. S1  $^1\text{H}$  NMR spectra of C6-s

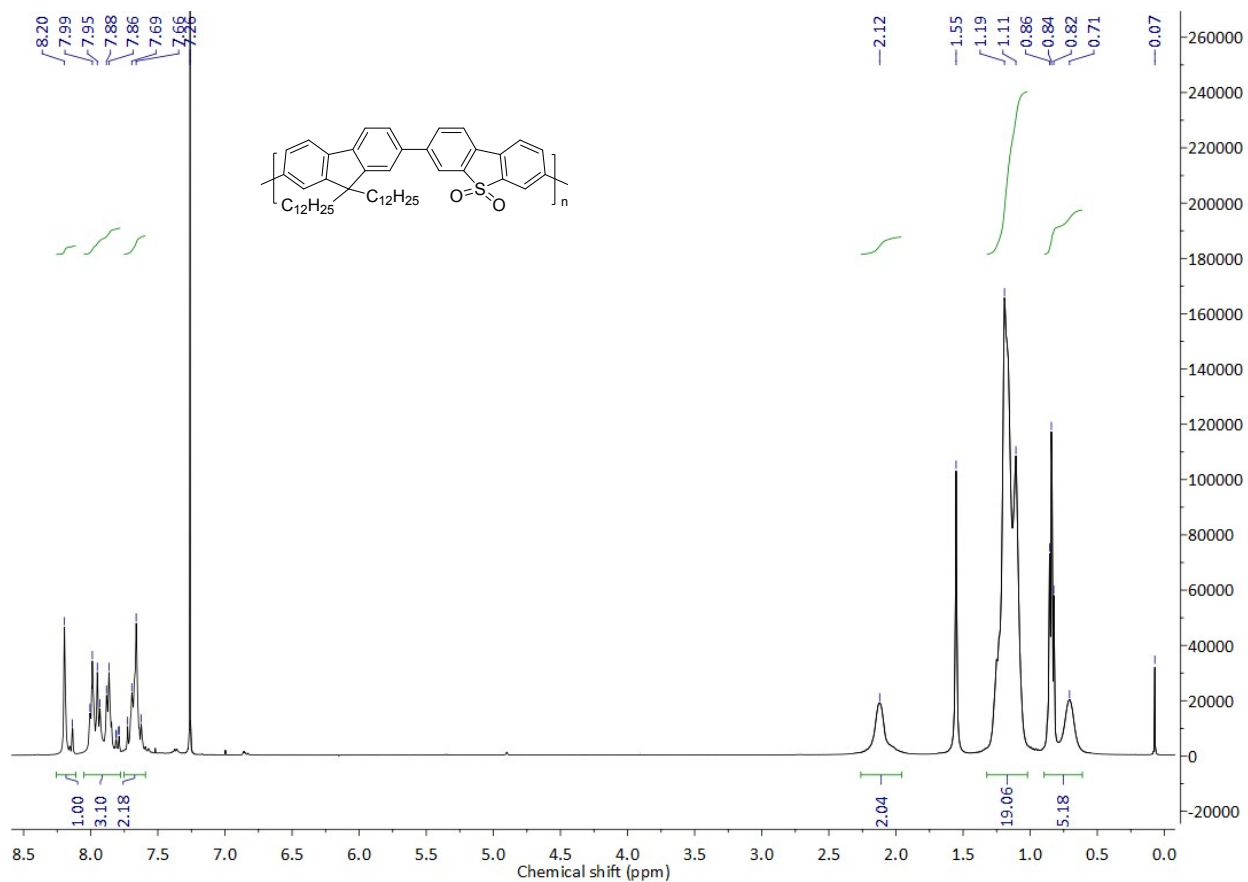

Fig. S2 <sup>1</sup>H NMR spectra of C12

#### ESI 4. FTIR spectra of polymers

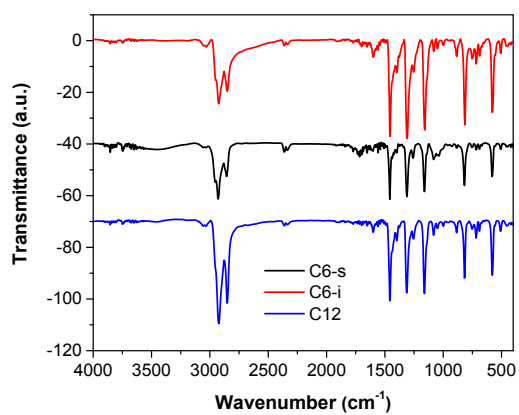

Fig. S3 FTIR spectra of polymers

## ESI 5. Thermogravimetric analysis of polymers

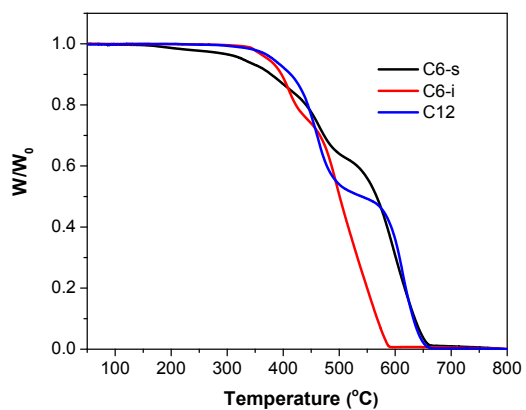

**Fig. S4** Thermogravimetric analysis (TGA) curves for three polymers, recorded under a nitrogen atmosphere with a heating rate of 15  $^{\circ}\text{C}/\text{min}$

## ESI 6. Cyclic voltammograms curves of $\text{Fc}/\text{Fc}^+$

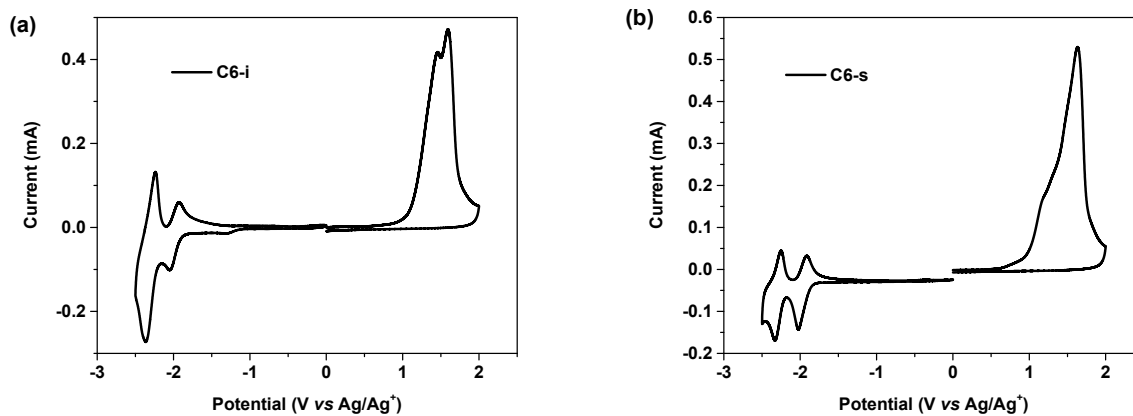

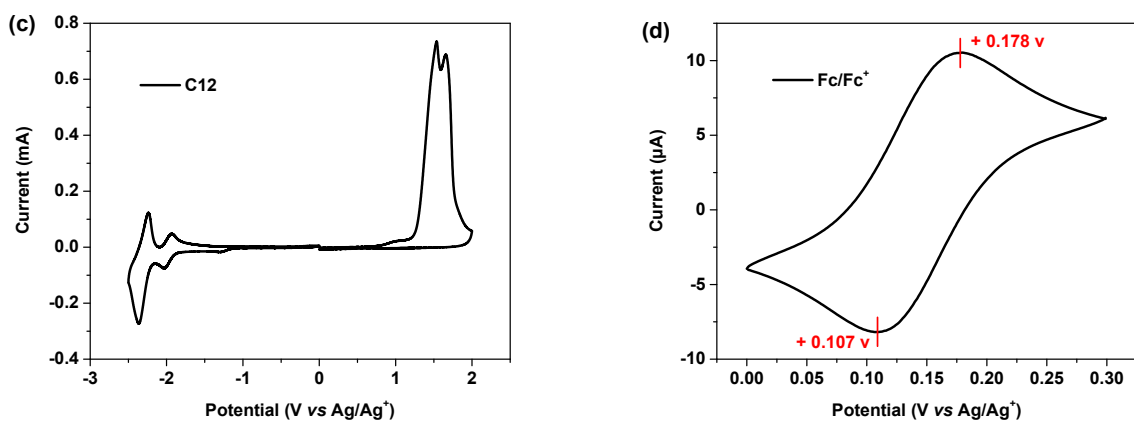

**Fig. S5** (a) Cyclic voltammograms curves of Fc/Fc<sup>+</sup> in anhydrous CH<sub>3</sub>CN solution of TBAPF<sub>6</sub> (0.1 M). The half-wave potential of the Fc/Fc<sup>+</sup> redox couple ( $E_{1/2, \text{Fc,Fc}^+}$ ) was found to be 0.145 V  $\{E_{1/2, \text{Fc,Fc}^+} = (E_{\text{ap}} + E_{\text{cp}})/2 = (0.178+0.107)/2 = 0.145 \text{ V}\}$  versus the Ag/Ag<sup>+</sup> reference electrode.

### ESI 7. XRD pattern of C6-i

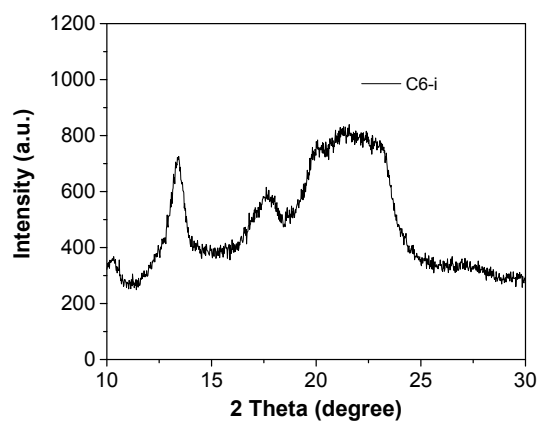

Figure S6. The XRD pattern of C6-i on FTO substrate.
